# Supplementary material for: A Multi-Omics Study of Chicken Infected by Nephropathogenic Infectious Bronchitis Virus
Source: MDPI journal article supplement (doi:10.3390/v11111070), 2019-11-16
Supplement: s1 [file s1]

**Supplementary Table S6. The relative abundance of 7 discriminative features (LDA score  $\geq 4$ ) identified by LEfSe analyse.**

| Class                                                                                            | Con1        | Con2        | Con3        | Con4        | Con5        | Con6        | Dis1        | Dis2        | Dis3        | Dis4        | Dis5        | Dis6        |
|--------------------------------------------------------------------------------------------------|-------------|-------------|-------------|-------------|-------------|-------------|-------------|-------------|-------------|-------------|-------------|-------------|
| Bacteria/Bacteroidetes/Bacteroidia/Bacteroidales/Bacteroidaceae                                  | 0.440737705 | 0.218893443 | 0.123442623 | 0.298504098 | 0.177971311 | 0.124590164 | 0.015901639 | 0.198401639 | 0.095942623 | 0.022418033 | 0.033913934 | 0.156536885 |
| Bacteria/Bacteroidetes/Bacteroidia/Bacteroidales/Bacteroidaceae/Bacteroides                      | 0.440737705 | 0.218893443 | 0.123442623 | 0.298504098 | 0.177971311 | 0.124590164 | 0.015901639 | 0.198401639 | 0.095942623 | 0.022418033 | 0.033913934 | 0.156536885 |
| Bacteria/Bacteroidetes/Bacteroidia/Bacteroidales/Bacteroidaceae/Bacteroides/Bacteroides_vulgatus | 0.369815574 | 0.198135246 | 0.106454918 | 0.253668033 | 0.154713115 | 0.086577869 | 0.011885246 | 0.094303279 | 0.06692623  | 0.007377049 | 0.007704918 | 0.14432377  |
| Bacteria/Firmicutes/Bacilli/Lactobacillales                                                      | 0.068934426 | 0.087356557 | 0.017233607 | 0.033463115 | 0.045102459 | 0.067479508 | 0.046803279 | 0.04352459  | 0.00375     | 0.004795082 | 0.011290984 | 0.008852459 |
| Bacteria/Firmicutes/Bacilli/Lactobacillales/Lactobacillaceae                                     | 0.05954918  | 0.084364754 | 0.015102459 | 0.022377049 | 0.038934426 | 0.062704918 | 0.033565574 | 0.031270492 | 0.0025      | 0.00375     | 0.011106557 | 0.007827869 |
| Bacteria/Firmicutes/Bacilli/Lactobacillales/Lactobacillaceae/Lactobacillus                       | 0.05954918  | 0.084364754 | 0.015102459 | 0.022377049 | 0.038934426 | 0.062704918 | 0.033565574 | 0.031270492 | 0.0025      | 0.00375     | 0.011106557 | 0.007827869 |
| Bacteria/Proteobacteria                                                                          | 0.018258197 | 0.005286885 | 0.010348361 | 0.010737705 | 0.023319672 | 0.024159836 | 0.614795082 | 0.048852459 | 0.039836066 | 0.111372951 | 0.057848361 | 0.008278689 |
