# Supplementary material for: A Multi-Omics Study of Chicken Infected by Nephropathogenic Infectious Bronchitis Virus
Source: MDPI journal article supplement (doi:10.3390/v11111070), 2019-11-16
Supplement: s1 [file s1]

**Supplementary Table S2. Differentially abundant metabolites identified by GC-TOFMS. Significant differences were declared at the level of  $P$ -value < 0.05 and VIP > 1.**

| Peak                                 | Similarity | rt        | Count | Mass | MEAN<br>Dis | MEAN<br>Con | VIP         | P-VALUE     | Q-VALUE     | FOLD<br>CHANGE | LOG<br>FOLDCHANGE |
|--------------------------------------|------------|-----------|-------|------|-------------|-------------|-------------|-------------|-------------|----------------|-------------------|
| Linoleic acid methyl ester           | 602        | 20.0213,0 | 25    | 67   | 0.000555538 | 0.030774116 | 1.679388506 | 0.001338807 | 0.003872007 | 0.018052111    | -5.791688621      |
| 3-phosphoglycerate                   | 659        | 17.0399,0 | 17    | 357  | 0.000414487 | 0.004936229 | 1.198542882 | 0.00060567  | 0.00203372  | 0.08396843     | -3.574009171      |
| 3,6-Anhydro-D-galactose 3            | 749        | 16.4613,0 | 21    | 231  | 0.007564958 | 0.083696122 | 1.878249401 | 2.22052E-05 | 0.000173177 | 0.090385999    | -3.467756876      |
| Biuret 3                             | 246        | 12.3701,0 | 15    | 69   | 0.002071647 | 0.015663249 | 1.26324578  | 0.016897573 | 0.027064497 | 0.132261616    | -2.918533665      |
| Galactonic acid                      | 780        | 18.9492,0 | 14    | 292  | 0.002891791 | 0.02122392  | 1.215498533 | 0.003424965 | 0.008039255 | 0.136251519    | -2.875655778      |
| 1,2,4-Benzenetriol                   | 368        | 14.7575,0 | 15    | 254  | 0.00261417  | 0.014769748 | 1.193008102 | 1.07566E-05 | 0.000111459 | 0.1769949      | -2.498220302      |
| glutathione 2                        | 388        | 22.005,0  | 16    | 174  | 0.007186624 | 0.040509588 | 1.654233761 | 0.010087805 | 0.018906185 | 0.177405513    | -2.494877252      |
| O-phosphonothreonine 4               | 526        | 17.4674,0 | 19    | 356  | 0.02198677  | 0.070486669 | 1.668727136 | 7.06561E-05 | 0.000363453 | 0.311928063    | -1.680714745      |
| O-Phosphoserine 1                    | 754        | 17.3578,0 | 27    | 356  | 0.071772511 | 0.185957671 | 1.591958847 | 0.000313071 | 0.001178763 | 0.385961548    | -1.373470972      |
| trans-4-hydroxy-L-proline 2          | 620        | 13.882,0  | 30    | 304  | 0.002175399 | 0.004165289 | 1.478255634 | 0.001741467 | 0.004794083 | 0.522268428    | -0.937136602      |
| Ethanolamine                         | 913        | 10.4532,0 | 30    | 174  | 0.294677592 | 0.516125634 | 1.561688425 | 0.000780765 | 0.002499383 | 0.570941594    | -0.808584926      |
| D-galacturonic acid 2                | 663        | 18.651,0  | 30    | 292  | 0.031803935 | 0.054807424 | 1.321180855 | 0.020401391 | 0.031149414 | 0.580285158    | -0.785166066      |
| guanine 1                            | 251        | 20.2692,0 | 27    | 267  | 0.016867281 | 0.028995265 | 1.546393446 | 0.002065427 | 0.005473892 | 0.581725367    | -0.781589878      |
| Phosphoglycolic acid                 | 582        | 14.4788,0 | 29    | 299  | 0.10269136  | 0.157969841 | 1.16307669  | 0.035999455 | 0.047666389 | 0.650069402    | -0.621334344      |
| Myristic Acid                        | 779        | 17.5477,0 | 30    | 117  | 0.010169677 | 0.01408986  | 1.370694744 | 0.016512323 | 0.026665025 | 0.721772763    | -0.470383393      |
| myo-inositol                         | 853        | 19.9332,0 | 30    | 317  | 0.143364806 | 0.195139066 | 1.494649068 | 0.003338975 | 0.00788545  | 0.734680194    | -0.444811713      |
| pantothenic acid                     | 873        | 18.9455,0 | 30    | 291  | 0.012610215 | 0.016808469 | 1.357240448 | 0.005474757 | 0.011924594 | 0.750229829    | -0.41459547       |
| glutamic acid                        | 925        | 14.9919,0 | 30    | 246  | 0.53020842  | 0.70445575  | 1.47628077  | 0.002783422 | 0.00685173  | 0.752649717    | -0.409949505      |
| creatine                             | 620        | 14.2274,0 | 29    | 220  | 0.462021688 | 0.596208394 | 1.475636981 | 0.002502    | 0.006313654 | 0.774933215    | -0.367856114      |
| 6-phosphogluconic acid               | 666        | 22.6914,0 | 30    | 318  | 0.15133722  | 0.19444415  | 1.171075132 | 0.026659964 | 0.038349118 | 0.778306885    | -0.361588975      |
| Purine riboside                      | 709        | 22.5942,0 | 30    | 217  | 0.018303265 | 0.023017487 | 1.087189017 | 0.044977591 | 0.0562077   | 0.795189526    | -0.330629341      |
| oxoproline                           | 824        | 13.8995,0 | 30    | 258  | 0.867388938 | 1.08570054  | 1.582051922 | 0.000818339 | 0.002593705 | 0.798921807    | -0.323873785      |
| Fructose 2,6-biphosphate degr prod 2 | 671        | 20.9922,0 | 30    | 227  | 0.353119713 | 0.431680869 | 1.366607431 | 0.008056121 | 0.016087169 | 0.818011032    | -0.289807795      |
| aspartic acid 1                      | 919        | 13.8268,0 | 30    | 232  | 1.047546561 | 1.231073106 | 1.291358962 | 0.013387327 | 0.023164409 | 0.85092149     | -0.232902067      |
| stearic acid                         | 926        | 21.3162,0 | 30    | 117  | 0.633788843 | 0.725719266 | 1.126546532 | 0.043307937 | 0.054610928 | 0.87332509     | -0.195409307      |
| 2-hydroxypyridine                    | 895        | 7.17394,0 | 30    | 152  | 0.50509408  | 0.424943961 | 1.319763992 | 0.00830203  | 0.016447858 | 1.188613385    | 0.249279533       |
| serine 1                             | 933        | 11.7403,0 | 30    | 73   | 4.01992316  | 3.345204922 | 1.296543211 | 0.015414498 | 0.025489757 | 1.201697132    | 0.265073334       |
| Erythrose 1                          | 478        | 12.9376,0 | 30    | 350  | 0.028951562 | 0.023775039 | 1.453549488 | 0.003168518 | 0.007574922 | 1.217729313    | 0.284193475       |
| ribose                               | 893        | 15.6039,0 | 30    | 103  | 0.283370756 | 0.225828662 | 1.523754916 | 0.00095356  | 0.00291822  | 1.254804212    | 0.327462277       |

|                               |     |           |    |     |             |             |             |             |             |             |             |
|-------------------------------|-----|-----------|----|-----|-------------|-------------|-------------|-------------|-------------|-------------|-------------|
| Bis(2-hydroxypropyl)amine 1   | 176 | 11.2165,0 | 29 | 341 | 0.002622943 | 0.002086571 | 1.246007663 | 0.017614682 | 0.027790978 | 1.257058594 | 0.330051898 |
| 2-deoxy-D-glucose 2           | 446 | 16.7263,0 | 30 | 319 | 0.00425983  | 0.003374116 | 1.129253675 | 0.031331097 | 0.043202    | 1.262502632 | 0.336286396 |
| oxalic acid                   | 691 | 8.49528,0 | 30 | 147 | 0.009006841 | 0.007099298 | 1.213848002 | 0.042051991 | 0.053390629 | 1.268694591 | 0.343344815 |
| mannose 2                     | 883 | 18.1856,0 | 30 | 160 | 0.978126085 | 0.766338072 | 1.436311108 | 0.002876765 | 0.007025319 | 1.276363685 | 0.352039467 |
| proline                       | 931 | 10.915,0  | 30 | 142 | 2.032631091 | 1.540911773 | 1.603356499 | 0.00042606  | 0.001522555 | 1.319109327 | 0.399564139 |
| Diglycerol 1                  | 370 | 16.4201,0 | 24 | 205 | 0.009439249 | 0.00706438  | 1.51174845  | 0.002239437 | 0.005818523 | 1.336175017 | 0.418108989 |
| sarcosine                     | 902 | 8.60011,0 | 30 | 116 | 0.030109051 | 0.022483839 | 1.196165537 | 0.027031464 | 0.038750367 | 1.339141896 | 0.421308837 |
| 2,3-Dimethylsuccinic acid     | 524 | 11.9438,0 | 30 | 247 | 0.002253233 | 0.001625659 | 1.251329105 | 0.017518975 | 0.027695279 | 1.386042424 | 0.470971416 |
| 4-Acetamidobutyric acid 1     | 265 | 13.4056,0 | 30 | 128 | 0.551764158 | 0.391152765 | 1.490543258 | 0.002036313 | 0.005414879 | 1.4106104   | 0.496319582 |
| N-Acetyl-beta-D-mannosamine 1 | 820 | 19.7701,0 | 30 | 202 | 0.047414901 | 0.033089835 | 1.67835438  | 6.30859E-05 | 0.000341474 | 1.432914387 | 0.518952414 |
| phenylalanine 1               | 927 | 15.0942,0 | 30 | 218 | 0.708990246 | 0.492659869 | 1.472770217 | 0.002425137 | 0.006171683 | 1.43910696  | 0.525173823 |
| oxalacetic acid               | 226 | 12.8378,0 | 29 | 327 | 0.001307862 | 0.000895134 | 1.372733281 | 0.008105102 | 0.016159468 | 1.461080109 | 0.547035281 |
| alanine 1                     | 898 | 8.11267,0 | 30 | 116 | 4.441732279 | 3.033142268 | 1.725068038 | 1.91477E-05 | 0.000159631 | 1.464399585 | 0.55030927  |
| 6-Hydroxynicotinic acid       | 403 | 14.3477,0 | 30 | 268 | 0.028753232 | 0.019273505 | 1.139049981 | 0.048263881 | 0.059268329 | 1.491852751 | 0.577105145 |
| methionine 1                  | 693 | 13.7994,0 | 30 | 176 | 0.319677365 | 0.212993449 | 1.375124791 | 0.007738333 | 0.015612494 | 1.500878864 | 0.585807542 |
| valine                        | 944 | 9.73336,0 | 30 | 144 | 1.777477746 | 1.177132789 | 1.708240113 | 3.54992E-05 | 0.000237361 | 1.510006146 | 0.594554422 |
| Isoleucine                    | 940 | 10.8386,0 | 30 | 158 | 1.0091127   | 0.653741719 | 1.660262104 | 0.000109874 | 0.000520863 | 1.543595384 | 0.626294635 |
| glycolic acid                 | 889 | 7.70828,0 | 30 | 147 | 0.023271429 | 0.014997593 | 1.674009235 | 0.000195293 | 0.000805186 | 1.551677562 | 0.633828797 |
| threonine 1                   | 946 | 12.0667,0 | 30 | 219 | 0.856959538 | 0.548452523 | 1.68530469  | 0.000312428 | 0.001176759 | 1.562504505 | 0.643860349 |
| Maleamate 1                   | 406 | 14.333,0  | 30 | 244 | 0.004624039 | 0.002877379 | 1.468115013 | 0.003236119 | 0.007698983 | 1.607031601 | 0.684398299 |
| 3-Hydroxypropionic acid 1     | 422 | 8.7495,0  | 30 | 234 | 0.006950911 | 0.004325119 | 1.703624594 | 5.29882E-05 | 0.000308312 | 1.607102914 | 0.684462318 |
| Glucoheptonic acid 1          | 351 | 21.6275,0 | 29 | 186 | 0.013254063 | 0.008139793 | 1.251826034 | 0.022770517 | 0.033976489 | 1.628304564 | 0.703370571 |
| Threonic acid                 | 772 | 14.035,0  | 30 | 292 | 0.006571077 | 0.003756775 | 1.564146469 | 0.000907199 | 0.002809506 | 1.749127185 | 0.806635197 |
| citrulline 1                  | 772 | 17.2579,0 | 30 | 256 | 0.017478599 | 0.009597667 | 1.477256942 | 0.002466475 | 0.006248335 | 1.821129864 | 0.864833804 |
| beta-Mannosylglycerate 2      | 727 | 17.2939,0 | 30 | 217 | 0.070173238 | 0.037796711 | 1.486628994 | 0.002211112 | 0.00576335  | 1.856596434 | 0.892660252 |
| D-Talose 1                    | 927 | 17.8572,0 | 30 | 319 | 0.224875566 | 0.118003419 | 1.769335632 | 0.000433839 | 0.00154515  | 1.90566993  | 0.93029826  |
| 2-Deoxy-D-galactose 2         | 366 | 16.7491,0 | 29 | 292 | 0.00265293  | 0.001339563 | 1.563667973 | 0.001667567 | 0.004631565 | 1.980444865 | 0.985824538 |
| Threitol                      | 845 | 13.6103,0 | 30 | 217 | 0.037419175 | 0.017655238 | 1.72107446  | 4.24257E-05 | 0.000267851 | 2.119437633 | 1.083681514 |
| shikimic acid                 | 271 | 17.0767,0 | 18 | 231 | 0.001555609 | 0.000722667 | 1.12841607  | 0.049444561 | 0.06034217  | 2.152593668 | 1.106076016 |
| 2-hydroxybutanoic acid        | 912 | 8.42903,0 | 30 | 131 | 0.047232573 | 0.020562052 | 1.839533736 | 1.0102E-07  | 3.87893E-06 | 2.297074835 | 1.199797858 |
| 2,3-dihydroxybenzoic acid     | 274 | 16.3921,0 | 30 | 254 | 0.001216254 | 0.000519653 | 1.650720135 | 0.000103028 | 0.000495186 | 2.340512359 | 1.226824383 |
| glutamine 2                   | 292 | 16.0949,0 | 30 | 216 | 0.008807071 | 0.00370031  | 1.596015112 | 0.000579976 | 0.001961525 | 2.380090151 | 1.251016219 |
| mannitol                      | 875 | 18.3763,0 | 29 | 319 | 0.115082046 | 0.047506989 | 1.458703721 | 9.65952E-05 | 0.000470404 | 2.422423458 | 1.276451081 |
| taurine                       | 899 | 15.5638,0 | 30 | 326 | 0.538725308 | 0.206806618 | 1.620447562 | 0.004660247 | 0.010449731 | 2.604971316 | 1.381267486 |

|                              |     |           |    |     |             |             |             |             |             |             |             |
|------------------------------|-----|-----------|----|-----|-------------|-------------|-------------|-------------|-------------|-------------|-------------|
| 2-Methylglutaric Acid        | 215 | 12.4972,0 | 28 | 172 | 0.005389937 | 0.001990387 | 1.873864512 | 2.4143E-08  | 1.79024E-06 | 2.707984018 | 1.437219225 |
| 3-Methyloxindole 2           | 296 | 14.1582,0 | 23 | 219 | 0.002285949 | 0.000724092 | 1.16108133  | 0.007018444 | 0.014499998 | 3.156988394 | 1.658548957 |
| Guanidinosuccinic acid 4     | 261 | 19.9537,0 | 23 | 398 | 0.087967426 | 0.027293238 | 1.679596924 | 0.000121496 | 0.000563997 | 3.223048383 | 1.688425846 |
| glucose-6-phosphate 1        | 819 | 21.8786,0 | 30 | 387 | 0.005930177 | 0.001696041 | 1.640092977 | 0.037427245 | 0.048975955 | 3.49648199  | 1.805904074 |
| thymine                      | 718 | 12.27,0   | 30 | 255 | 0.005358506 | 0.001450383 | 1.837191072 | 0.00013137  | 0.000599264 | 3.694545136 | 1.885396754 |
| 2,4-diaminobutyric acid 4    | 333 | 14.9653,0 | 29 | 331 | 0.068840226 | 0.016719071 | 1.856543698 | 1.8604E-09  | 4.49782E-07 | 4.117467175 | 2.041757149 |
| MALONAMIDE 5                 | 496 | 12.6889,0 | 24 | 89  | 0.053106277 | 0.012556203 | 1.85972358  | 2.54556E-08 | 1.8135E-06  | 4.229485424 | 2.08048215  |
| uric acid                    | 820 | 19.9851,0 | 30 | 442 | 1.144751718 | 0.268330606 | 1.797553804 | 1.2626E-06  | 2.02667E-05 | 4.266198838 | 2.092951208 |
| 5,6-dihydrouracil 1          | 422 | 13.3284,0 | 25 | 100 | 0.099253817 | 0.022290133 | 1.854379223 | 0.000219184 | 0.000872335 | 4.452813988 | 2.154717346 |
| Glutaric Acid                | 545 | 12.3446,0 | 22 | 261 | 0.000817063 | 0.000176764 | 1.37168867  | 0.000335415 | 0.001247573 | 4.622336232 | 2.208622206 |
| 1,3-diaminopropane           | 332 | 16.5282,0 | 30 | 202 | 0.080540387 | 0.01515143  | 1.821555409 | 2.25585E-07 | 6.05988E-06 | 5.315695506 | 2.410258466 |
| N-Acetyl-L-leucine 1         | 182 | 13.7389,0 | 23 | 197 | 0.001523009 | 0.000188585 | 1.624189156 | 0.000171094 | 0.000732065 | 8.075984772 | 3.01363819  |
| Digitoxose 1                 | 246 | 14.9958,0 | 17 | 69  | 0.009647704 | 0.001144052 | 1.410211736 | 1.66027E-05 | 0.000147135 | 8.432926781 | 3.076033428 |
| Fluorene                     | 308 | 15.1693,0 | 23 | 258 | 0.002370293 | 0.000204833 | 1.323624161 | 2.17448E-07 | 5.95822E-06 | 11.57183003 | 3.532545133 |
| Adipamide 5                  | 371 | 16.9787,0 | 25 | 204 | 0.003577104 | 0.000239861 | 1.480738123 | 1.54744E-05 | 0.000141077 | 14.91325075 | 3.898522862 |
| 2,5-dihydroxybenzaldehyde    | 179 | 15.8532,0 | 24 | 330 | 0.002955961 | 0.000182474 | 1.660791159 | 5.82327E-06 | 7.03937E-05 | 16.19931838 | 4.017861205 |
| e                            |     |           |    |     |             |             |             |             |             |             |             |
| Atrazine-2-hydroxy 6         | 287 | 18.5926,0 | 16 | 357 | 0.02775076  | 0.001631184 | 1.635414655 | 4.66831E-05 | 0.00028496  | 17.01264797 | 4.088535805 |
| N-alpha-Acetyl-L-ornithine 3 | 290 | 15.8142,0 | 29 | 188 | 0.020155049 | 0.001099357 | 1.183242877 | 3.8004E-05  | 0.000248795 | 18.33349343 | 4.196409811 |
| succinate                    | 706 | 9.30685,0 | 23 | 113 | 0.005502796 | 0.000289358 | 1.666572699 | 6.13154E-07 | 1.26431E-05 | 19.01726907 | 4.249238181 |
| semialdehyde 1               |     |           |    |     |             |             |             |             |             |             |             |
| noradrenaline                | 395 | 20.594,0  | 22 | 128 | 0.002843847 | 9.25649E-05 | 1.344325724 | 0.01103395  | 0.020178894 | 30.72272626 | 4.941234338 |
| N-formyl-L-methionine 1      | 262 | 16.0023,0 | 22 | 272 | 0.00141416  | 2.67276E-08 | 1.894035371 | 5.06013E-05 | 0.000299733 | 52910.08386 | 15.69125508 |
| alpha-ketoisocaproic acid 1  | 511 | 9.69452,0 | 7  | 200 | 0.001547437 | 2.67276E-08 | 1.371673354 | 0.029817188 | 0.041673807 | 57896.57383 | 15.82119036 |
| 4-hydroxyphenylacetic acid   | 521 | 15.2488,0 | 12 | 179 | 0.001753596 | 2.67276E-08 | 1.892431425 | 0.00079226  | 0.002528439 | 65609.91768 | 16.00162629 |
| alpha-ketoglutaric acid      | 533 | 14.4595,0 | 11 | 198 | 0.002217391 | 2.67276E-08 | 1.347725747 | 0.038250964 | 0.049719456 | 82962.58431 | 16.34017321 |
| nicotine                     | 390 | 14.117,0  | 17 | 142 | 0.002959982 | 2.67276E-08 | 1.337111472 | 0.029911858 | 0.041770589 | 110746.2489 | 16.75689831 |
| 3-Phenyllactic acid          | 602 | 14.5772,0 | 18 | 193 | 0.006018325 | 2.67276E-08 | 1.890879762 | 0.004377449 | 0.009917111 | 225172.6306 | 17.78067195 |
| canavanine 1                 | 323 | 19.0176,0 | 14 | 204 | 0.014224865 | 2.67276E-08 | 1.893695028 | 0.000506171 | 0.001748221 | 532216.2134 | 19.02165294 |
