# Supplementary material for: A Multi-Omics Study of Chicken Infected by Nephropathogenic Infectious Bronchitis Virus
Source: MDPI journal article supplement (doi:10.3390/v11111070), 2019-11-16
Supplement: s1 [file s1]

**Supplementary Table S4. DEGs in enriched pathways for correlation analysis.**

| Pathway                                     | Gene name     | Con1        | Con2        | Con3        | Con4        | Dis1        | Dis2        | Dis3        | Dis4        |
|---------------------------------------------|---------------|-------------|-------------|-------------|-------------|-------------|-------------|-------------|-------------|
| Alanine, aspartate and glutamate metabolism | NIT2          | 71.603132   | 80.865232   | 74.095905   | 89.600993   | 32.3776     | 17.64349    | 30.501206   | 33.4303426  |
|                                             | ABAT          | 312.40373   | 303.81609   | 333.7616305 | 326.313048  | 36.94086524 | 46.72609726 | 47.02183771 | 76.58192001 |
|                                             | ALDH4A1       | 769.846     | 802.751     | 1064.741    | 912.107     | 327.064     | 179.2577    | 210.536     | 405.55      |
|                                             | GLUL          | 2.832552    | 2.498347516 | 1.77183847  | 2.159829    | 15.450736   | 5.904455    | 14.152556   | 5.002988    |
|                                             | GPT2          | 93.7561     | 94.2833     | 93.5824     | 73.2361     | 691.692     | 645.451     | 714.117     | 836.649     |
|                                             | GFPT2         | 2.304530714 | 1.491460928 | 1.593819808 | 2.420851819 | 5.148460257 | 4.822846442 | 7.228362908 | 3.502842035 |
|                                             | IL4I1         | 0.440804212 | 0.030207    | 0.0536097   | 0           | 65.2104     | 10.38933    | 10.69482    | 23.59575    |
|                                             | ASNS          | 8.765867783 | 7.802552    | 6.047259814 | 7.546842938 | 56.047583   | 26.926292   | 41.8027469  | 29.2936741  |
|                                             | ADSS          | 13.55348983 | 12.03451    | 13.2820522  | 12.39195173 | 47.05024518 | 30.20439789 | 30.31583663 | 34.12430689 |
| Valine, leucine and isoleucine biosynthesis | BCAT1         | 65.0789     | 73.1019     | 64.0636     | 78.6691     | 19.7189     | 29.6001     | 22.7196     | 30.9857     |
|                                             | SDSL          | 247.464     | 297.526     | 352.986     | 319.334     | 89.4963     | 84.7367     | 68.2857     | 124.5895    |
| Arginine and proline metabolism             | CKB           | 289.5898    | 244.5941    | 324.1446    | 405.3524    | 122.0761    | 103.2929    | 90.25225    | 222.2465    |
| Glutathione metabolism                      | C10ORF65      | 505.988     | 553.747     | 841.974     | 636.92      | 168.385     | 58.8952     | 148.66      | 204.672     |
|                                             | ALDH9A1       | 380.3040054 | 390.1440071 | 382.9430064 | 510.3390062 | 124.4530053 | 89.8085047  | 99.95950339 | 159.7490055 |
|                                             | GATM          | 572.37404   | 595.4976    | 655.2527044 | 488.2999513 | 11.82656548 | 18.52691922 | 13.06015173 | 16.5508277  |
|                                             | RP11-162P23.2 | 423.3867    | 528.1900116 | 514.875219  | 533.4394    | 203.0698    | 140.619477  | 207.2379    | 192.7922    |
|                                             | NOS1          | 4.395263335 | 6.0244273   | 6.4434526   | 4.8750543   | 0.305226761 | 0.62194768  | 0.507257873 | 2.5615011   |
|                                             | MAOB          | 32.5755     | 25.0599     | 28.9006     | 31.7521     | 9.46501     | 8.8452      | 10.4174     | 8.6347      |
|                                             | MAOA          | 16.04171313 | 14.35917145 | 26.10310012 | 17.25202598 | 5.08764691  | 8.68289954  | 6.326099851 | 7.648744    |
|                                             | AGMAT         | 56.758638   | 73.75407    | 89.87713    | 51.87863    | 15.884174   | 12.31735    | 13.414976   | 25.630151   |
|                                             | GAMT          | 544.669287  | 581.88673   | 622.4979    | 715.911     | 5.93929     | 44.843917   | 16.74010007 | 31.17090027 |
|                                             | ALDH7A1       | 170.789     | 179.939     | 203.416     | 209.251     | 66.6884     | 51.8529     | 63.8835     | 74.4329     |
|                                             | PRODH2        | 415.201     | 685.11      | 569.377     | 520.441     | 38.2354     | 43.9815     | 56.1652     | 72.4157     |
|                                             | CNDP1         | 7.379936504 | 16.91711926 | 18.95411533 | 17.51504971 | 1.935718974 | 4.94030656  | 3.292934317 | 3.243590986 |
|                                             | CKMT1A        | 0.2011842   | 0.40097013  | 0.1871124   | 0.325215    | 2.925215    | 1.686977    | 1.907165    | 3.177458    |
|                                             | AMD1          | 17.2087     | 14.6945     | 15.4666     | 18.8804     | 49.4648     | 34.5065     | 43.8706     | 43.9003     |
|                                             | SMOX          | 2.912060694 | 3.203080909 | 3.754452062 | 3.625748852 | 9.840825227 | 10.4087025  | 7.812892357 | 7.349482632 |
|                                             | SRM           | 12.360831   | 12.89892    | 10.29326    | 10.14283    | 31.885431   | 29.541421   | 30.454784   | 22.985432   |
|                                             | RRM1          | 8.053977    | 5.728037    | 6.578884052 | 4.866717    | 15.562669   | 18.75138968 | 15.507774   | 11.90605952 |
|                                             | GPX2          | 5.30169     | 2.56245     | 2.70851     | 3.47838     | 27.7109     | 44.1503     | 19.6374     | 18.3542     |
|                                             | ODC1          | 14.18965687 | 11.6022817  | 12.72195    | 11.725163   | 67.77228    | 52.03775    | 54.27774    | 47.430328   |
|                                             | GSTO1         | 16.42423964 | 22.26502    | 17.13582    | 21.7016223  | 43.76257    | 43.72796707 | 39.56811327 | 37.6798     |
| Glutathione metabolism                      | RRM2          | 29.2875     | 24.74863    | 37.4647     | 12.23911    | 44.781      | 89.451      | 55.56502    | 56.3835     |
|                                             | GSS           | 104.2556    | 105.9655    | 151.0077    | 121.8454    | 45.53765    | 46.3694     | 44.74865    | 73.45052    |
|                                             | GSTA3         | 535.2008    | 300.0757    | 422.911     | 505.351     | 109.1063    | 72.4012     | 31.51924    | 69.4909     |
|                                             | SMS           | 91.709307   | 93.83137629 | 86.44696822 | 93.19073043 | 30.30695035 | 29.95071912 | 32.75486128 | 38.18907269 |
|                                             | GSTA4         | 410.1197553 | 332.949756  | 185.60031   | 243.313726  | 75.5452128  | 177.1804401 | 89.607263   | 79.72482041 |
|                                             | GCLC          | 59.19261    | 46.72996    | 48.14314    | 54.29354    | 18.10372    | 27.81567    | 18.87879    | 26.95386    |
|                                             | ANPEP         | 415.0968    | 363.3225    | 448.9513    | 482.00332   | 111.44613   | 163.5249    | 94.53399    | 153.5575    |

|                     |          |             |             |             |             |             |             |             |             |
|---------------------|----------|-------------|-------------|-------------|-------------|-------------|-------------|-------------|-------------|
| Taurine and         | CDO1     | 378.465     | 294.257     | 389.387     | 332.751     | 50.6474     | 115.51      | 46.9607     | 92.1066     |
| hypotaurine         | BAAT     | 253.269     | 201.2751    | 235.896     | 212.0223    | 66.6602     | 105.1931    | 45.2679     | 82.8542     |
| metabolism          | GGT1     | 96.243928   | 98.030581   | 83.28924    | 95.634978   | 252.3137    | 200.47347   | 163.039183  | 181.912703  |
| Toll-like receptor  | MAP2K6   | 4.25629556  | 4.59053833  | 6.18478103  | 6.061521672 | 0.729185    | 1.591598573 | 1.499387928 | 1.553729816 |
| signaling pathway   | NFKBIA   | 36.9569     | 17.5547     | 26.0391     | 21.8563     | 92.7917     | 72.0545     | 78.2277     | 50.1689     |
|                     | FOS      | 65.9663     | 14.1148     | 17.4933     | 14.0301     | 74.7772     | 110.918     | 70.7239     | 50.3106     |
|                     | STAT1    | 62.439      | 14.82118    | 17.46202    | 14.93301    | 114.5458    | 54.9086     | 69.7714     | 126.9416    |
|                     | CD86     | 0.530476791 | 0.338996751 | 0.127733322 | 0.262139446 | 1.675709094 | 1.441345    | 1.121094137 | 2.069842813 |
|                     | JUN      | 63.1099     | 29.1786     | 38.3154     | 31.8193     | 199.457     | 165.682     | 118.67      | 137.015     |
|                     | IRF1     | 65.85490771 | 14.64216029 | 13.752105   | 11.49495    | 148.8513094 | 63.39996471 | 106.8813211 | 141.1075395 |
|                     | CD80     | 1.61927     | 0.289929    | 0.629646    | 0.43863     | 9.14804     | 7.02659     | 7.83021     | 4.72385     |
|                     | TLR4     | 1.431777    | 0.669567    | 0.745925    | 0.470317697 | 10.26368    | 9.25241     | 4.41967     | 5.70615     |
|                     | PIK3R5   | 3.8251775   | 1.196221544 | 1.823405495 | 1.317520716 | 17.8592662  | 8.6167511   | 11.9070785  | 10.08818238 |
|                     | PIK3CD   | 2.780914    | 1.285505533 | 0.975937111 | 0.932581    | 7.547614893 | 6.21895825  | 6.444042    | 5.058966196 |
|                     | TLR7     | 0.913652952 | 0.345442131 | 0.714439863 | 0.791350791 | 6.581399985 | 4.026234216 | 2.036750878 | 2.857612    |
|                     | IRF5     | 1.58835986  | 1.26338298  | 0.8661456   | 1.089538918 | 12.8768361  | 11.1654243  | 5.969877635 | 7.387919271 |
|                     | MYD88    | 23.84632606 | 19.998613   | 16.55749307 | 15.37328267 | 40.764662   | 38.68185101 | 33.187205   | 40.33444185 |
|                     | MAP3K8   | 0.368374857 | 0.093703747 | 0.171752861 | 0.062301188 | 2.465799022 | 2.229510206 | 2.192733722 | 1.90529169  |
|                     | IRF4     | 2.856606759 | 1.014937914 | 1.112596907 | 0.275859062 | 7.608422773 | 11.18227539 | 25.72109291 | 5.628806094 |
|                     | LY96     | 4.028964389 | 1.257109275 | 1.183611399 | 0.774908492 | 33.33173406 | 13.34970155 | 17.56247683 | 18.83713398 |
|                     | TLR2B    | 1.37174812  | 0.879439    | 0.6362068   | 0.8641868   | 5.578446    | 6.210908    | 2.963125    | 6.811834726 |
|                     | SPP1     | 633.184     | 714.714     | 904.752     | 632.161     | 32879.3     | 14296.3     | 19221.8     | 23300.6     |
|                     | TLR1B    | 2.606954    | 1.08469     | 1.992327    | 1.132797    | 27.3045     | 13.72107    | 7.86745     | 11.15004    |
|                     | IL12B    | 0.104763513 | 0.41572533  | 0.094278016 | 0.091346082 | 12.38135769 | 1.147767994 | 8.7655963   | 6.070706109 |
|                     | TLR1A    | 0.84342565  | 0.426374178 | 0.398132805 | 0.152420965 | 2.76800307  | 1.18052614  | 3.183935541 | 4.140815231 |
| RIG-I-like receptor | DAK      | 133.054     | 126.5485    | 145.6295    | 133.2798    | 31.5293     | 62.8993     | 42.512      | 39.4742     |
| signaling pathway   | TRAF3    | 1.760503664 | 1.044786563 | 1.31290343  | 1.262775537 | 6.428068734 | 4.163610317 | 5.728049348 | 4.037333738 |
|                     | CASP8    | 2.51719918  | 1.8250898   | 1.742102991 | 2.366821309 | 6.786018953 | 5.221523855 | 4.027567279 | 5.402663192 |
|                     | IFIH1    | 10.1824     | 4.11908     | 3.65955     | 3.51363     | 25.817      | 12.9088     | 14.8276     | 38.0059     |
|                     | TRAF2    | 11.39488676 | 8.540602896 | 9.57905075  | 8.317487329 | 23.9925383  | 21.50245915 | 22.21927644 | 22.30211461 |
|                     | TRIM25   | 16.52735728 | 5.839458    | 9.044854581 | 6.568616782 | 29.16190226 | 19.88690824 | 23.08043673 | 41.05184008 |
|                     | IKBKE    | 2.18057219  | 1.152881155 | 1.89486     | 1.096546411 | 9.044769337 | 5.532039436 | 5.654477794 | 7.193297487 |
|                     | MAPK11   | 8.752827325 | 10.00947    | 7.644642    | 9.694101    | 29.52769    | 16.513337   | 18.95018    | 17.0193     |
|                     | RIPK1    | 6.606422023 | 5.121945493 | 4.642057896 | 5.599313003 | 14.5102531  | 10.88786411 | 11.480688   | 11.54852283 |
|                     | IL8L1    | 0.234313    | 0.134523    | 0.316399    | 0           | 7.07631     | 3.15695     | 4.82439     | 2.7661      |
|                     | IL8L2    | 0.127245    | 0           | 0.128063    | 0.0905099   | 8.2915      | 2.69807     | 6.03598     | 3.75036     |
|                     | IRF7     | 40.7185     | 11.0478     | 17.4223     | 10.6913     | 73.1037     | 37.8967     | 50.6377     | 64.2461     |
| NOD-like receptor   | PSTPIP1  | 1.825958    | 0.746105    | 0.713967    | 0.674481    | 6.42951     | 4.772357    | 3.829956    | 4.870013    |
| signaling pathway   | RIPK3    | 0.606444001 | 0.918943409 | 0.762654504 | 0.52931981  | 4.5813074   | 3.100644185 | 2.655739501 | 2.9135843   |
|                     | BIRC2    | 23.18757916 | 16.39102687 | 14.99002373 | 17.61406048 | 76.7819778  | 42.7203593  | 57.761172   | 57.4761153  |
|                     | NOD1     | 1.791660149 | 2.253268    | 1.8076949   | 1.941178    | 4.486049    | 5.253927    | 3.4185654   | 5.267261    |
|                     | HSP90AB1 | 9.07988878  | 6.716221    | 5.400646533 | 7.038127913 | 15.67071128 | 15.22992492 | 21.01133802 | 9.256559302 |
|                     | TNFAIP3  | 3.26323482  | 1.2780938   | 1.955257679 | 1.769867823 | 10.20529042 | 7.76736601  | 8.363994236 | 7.340162    |
|                     | IL18     | 0.127245    | 0           | 0.128063    | 0.0905099   | 8.2915      | 2.69807     | 6.03598     | 3.75036     |
