# Supplementary material for: A Multi-Omics Study of Chicken Infected by Nephropathogenic Infectious Bronchitis Virus
Source: MDPI journal article supplement (doi:10.3390/v11111070), 2019-11-16
Supplement: s1 [file s1]

**Supplementary Table S1. Primers of selected genes for RT-qPCR.**

| <b>Gene</b> | <b>Forward primer</b>         | <b>Reverse primer</b>       |
|-------------|-------------------------------|-----------------------------|
| MYD88       | 5' TTGACTTCTGCATGGGTCCT 3'    | 5' TTGCTCCACAGTCACCAGAT 3'  |
| IRF7        | 5' AGTACTGGTACGAGCAGGTG 3'    | 5' TCAGTCTGTCTGCATGTGGT 3'  |
| IL-18       | 5' GTGTGTGCAGTACGGCTTAG 3'    | 5' TCCACTGCCAGATTTCACCT 3'  |
| TRAF3       | 5' CCAGCTCTCAGCAGCAGGAGACA 3' | 5' TCAGCACGAGGACACGGAAGC 3' |
| TLR7        | 5' CCAGATGCCTGCTATGATGC 3'    | 5' TCAGCTGAATGCTCTGGGAA 3'  |
| TLR4        | 5' CATAAAGCCACTCCAAGCC 3'     | 5' AGGATTTCAGGGCTGAGTC 3'   |
| IL-8        | 5' GCAAGGTAGGACGCTGGTAA 3'    | 5' GCGTCAGCTTCACATCTTGA 3'  |
| GAPDH       | 5' TGGCATCCAAGGAGTGAGC 3'     | 5' GGGGAGACAGAAGGGAACAG 3'  |
