# Supplementary material for: A Multi-Omics Study of Chicken Infected by Nephropathogenic Infectious Bronchitis Virus
Source: MDPI journal article supplement (doi:10.3390/v11111070), 2019-11-16
Supplement: s1 [file s1]

**Supplementary Table S3. Basic summary of sequence and sequencing reads mapping to reference genome.**

| <b>Sample name</b> | <b>Nor1</b> | <b>Nor2</b> | <b>Nor3</b> | <b>Nor4</b> | <b>Dis1</b> | <b>Dis2</b> | <b>Dis3</b> | <b>Dis4</b> |
|--------------------|-------------|-------------|-------------|-------------|-------------|-------------|-------------|-------------|
| Clean reads        | 70634494    | 62725636    | 72022668    | 65347746    | 63184400    | 69714812    | 74909822    | 65748400    |
| Clean bases        | 10540771138 | 9354925902  | 10738879816 | 9747412458  | 9420602814  | 10384745730 | 11178689528 | 9809949868  |
| GC content (%)     | 52.14%      | 52.00%      | 52.34%      | 51.70%      | 52.35%      | 52.99%      | 53.09%      | 52.76%      |
| ≥Q30%              | 90.59%      | 90.50%      | 90.70%      | 90.53%      | 90.75%      | 90.37%      | 90.48%      | 90.46%      |
| Mapped reads       | 55703112    | 49556909    | 57103776    | 51486983    | 48881880    | 54505329    | 56625975    | 51372990    |
| Uniq mapped reads  | 48693955    | 42815884    | 49482548    | 47049534    | 44148391    | 47217471    | 51416673    | 44615714    |
| Multiple map reads | 7009157     | 6741025     | 7621228     | 4437449     | 4733489     | 7287858     | 5209302     | 6757276     |
| Reads map to '+'   | 27362658    | 24319365    | 28014121    | 25374162    | 23987517    | 26671432    | 25857823    | 25161253    |
| Reads map to '-'   | 27091663    | 23971886    | 27734642    | 25279359    | 23986878    | 26462043    | 27714491    | 24957413    |
