# Supplementary material for: A Multi-Omics Study of Chicken Infected by Nephropathogenic Infectious Bronchitis Virus
Source: MDPI journal article supplement (doi:10.3390/v11111070), 2019-11-16
Supplement: s1 [file s1]

## Supplementary Table S5. Differentially abundant metabolites in enriched pathways for correlation analysis.

| Pathway                     | Peak                 | Con1        | Con2        | Con3        | Con4        | Con5        | Con6        | Dis1        | Dis2        | Dis3        | Dis4        | Dis5        | Dis6        |
|-----------------------------|----------------------|-------------|-------------|-------------|-------------|-------------|-------------|-------------|-------------|-------------|-------------|-------------|-------------|
| Alanine,                    | oxalacetic acid      | 0.00069376  | 0.000775381 | 0.00111535  | 0.00101158  | 0.000985463 | 0.00078927  | 0.001663509 | 0.000925736 | 0.001222204 | 0.001200864 | 0.00151636  | 0.001318499 |
| aspartate and aspartic acid |                      | 1.245602617 | 1.115647598 | 1.169873277 | 1.344638615 | 1.315988664 | 1.194687867 | 0.997435413 | 1.207555147 | 0.894560244 | 1.174310246 | 1.041881507 | 0.969536812 |
| glutamate                   | glutamine            | 0.006504834 | 0.004754972 | 0.002107914 | 0.002702488 | 0.003454423 | 0.002677228 | 0.010017281 | 0.009867015 | 0.011405403 | 0.007461883 | 0.006345433 | 0.007745412 |
| metabolism                  |                      |             |             |             |             |             |             |             |             |             |             |             |             |
| Valine,                     | alpha-ketoisocaproic | 2.32584E-08 | 2.43822E-08 | 2.46245E-08 | 2.68561E-08 | 2.81891E-08 | 3.30552E-08 | 0.001808934 | 0.002014879 | 2.86198E-08 | 0.002908737 | 2.75615E-08 | 0.002552014 |
| leucine and                 | acid                 |             |             |             |             |             |             |             |             |             |             |             |             |
| isoleucine                  | valine               | 1.347067655 | 0.95798684  | 1.100705123 | 1.328439253 | 1.319294501 | 1.009303362 | 1.969645684 | 1.828905948 | 1.73089642  | 1.703842288 | 1.646863532 | 1.784712606 |
| biosynthesis                | Isoleucine           | 0.756467046 | 0.51328024  | 0.615290369 | 0.7644325   | 0.745037067 | 0.527943092 | 1.163672517 | 0.997390744 | 0.950799299 | 1.004283569 | 0.939901522 | 0.998628549 |
|                             | threonine            | 0.639825259 | 0.477412263 | 0.511098378 | 0.57224298  | 0.607332733 | 0.482803525 | 0.895383097 | 1.064144738 | 0.726852101 | 0.871724753 | 0.73855603  | 0.845096511 |
| Arginine and sarcosine      |                      |             |             |             |             |             |             |             |             |             |             |             |             |
| proline                     |                      |             |             |             |             |             |             |             |             |             |             |             |             |
| metabolism                  |                      |             |             |             |             |             |             |             |             |             |             |             |             |
|                             |                      | 0.026200365 | 0.021030481 | 0.015067966 | 0.020069122 | 0.026695531 | 0.025839572 | 0.027126155 | 0.031256197 | 0.039481909 | 0.032399634 | 0.023963886 | 0.026426527 |
|                             |                      |             |             |             |             |             |             |             |             |             |             |             |             |
|                             | proline              | 1.809536368 | 1.380092931 | 1.414305467 | 1.614864375 | 1.732238802 | 1.294432694 | 2.129820516 | 2.078096425 | 1.869587314 | 1.946557224 | 2.13341911  | 2.038305959 |
| 4-Acetamidobutyric          |                      |             |             |             |             |             |             |             |             |             |             |             |             |
| acid                        |                      | 0.443652301 | 0.368966921 | 0.322735892 | 0.444951852 | 0.468452029 | 0.298157594 | 0.600173983 | 0.522831342 | 0.445218888 | 0.608786123 | 0.595380281 | 0.538194332 |
| trans-4-hydroxy-L-          |                      |             |             |             |             |             |             |             |             |             |             |             |             |
| proline                     |                      | 0.003554071 | 0.003723472 | 0.003975702 | 0.003903037 | 0.005710748 | 0.004124704 | 0.001106948 | 0.001452241 | 0.002328569 | 0.002758136 | 0.003406049 | 0.002000451 |
| creatine                    |                      | 0.652634916 | 0.639044267 | 0.533070728 | 0.601087609 | 0.660223668 | 0.491189179 | 0.53004083  | 0.449339273 | 0.491131763 | 0.403062037 | 0.456401113 | 0.442155112 |
| 1,3-diaminopropane          |                      | 0.022866514 | 0.01161995  | 0.01995071  | 0.016753506 | 0.010162768 | 0.00955513  | 0.089788665 | 0.077093926 | 0.093719784 | 0.080220754 | 0.060162905 | 0.082256289 |
| Taurine and                 | alpha-ketoglutaric   | 2.32584E-08 | 2.43822E-08 | 2.46245E-08 | 2.68561E-08 | 2.81891E-08 | 3.30552E-08 | 0.002276523 | 0.003163532 | 2.86198E-08 | 2.39197E-08 | 0.002864803 | 0.004999436 |
| hypotaurine                 | acid                 |             |             |             |             |             |             |             |             |             |             |             |             |
| metabolism                  | taurine              | 0.264335014 | 0.151974736 | 0.161436719 | 0.166132743 | 0.208823474 | 0.288137022 | 0.394439899 | 0.573998774 | 0.776059348 | 0.309253305 | 0.487448998 | 0.691151523 |
| Glutathione                 | oxoproline           | 0.978397115 | 1.133065815 | 0.957530716 | 1.163982759 | 1.134511874 | 1.14671496  | 0.839841805 | 0.935837837 | 0.814526421 | 0.964857603 | 0.810364122 | 0.838911237 |
| metabolism                  | glutathione          | 0.049523975 | 0.071254053 | 0.027050411 | 0.048412323 | 0.034008427 | 0.012808341 | 0.006364589 | 0.008683468 | 0.003772334 | 0.009364897 | 0.008492777 | 0.006441679 |
| others                      | phenylalanine        | 0.643322328 | 0.399856889 | 0.426208142 | 0.555333741 | 0.572795858 | 0.358442253 | 0.772510391 | 0.72916533  | 0.613069789 | 0.789921659 | 0.668087546 | 0.681186762 |
|                             | beta-                |             |             |             |             |             |             |             |             |             |             |             |             |
| Mannosylglycerate           |                      | 0.04469574  | 0.054241862 | 0.023946093 | 0.036955535 | 0.037968563 | 0.02897247  | 0.068155819 | 0.073446344 | 0.040582493 | 0.078567108 | 0.071773785 | 0.088513879 |
| uric acid                   |                      | 0.318763088 | 0.16704227  | 0.192946018 | 0.288602988 | 0.434143096 | 0.208486175 | 1.188426024 | 1.27935287  | 1.237294221 | 0.783340446 | 1.135820205 | 1.244276545 |
| guanine                     |                      | 0.02759396  | 0.036703792 | 0.022421724 | 0.026228451 | 0.034371404 | 0.026652261 | 0.014538958 | 0.026263732 | 0.016747178 | 0.015715016 | 0.014682808 | 0.013255997 |
| 2-hydroxybutanoic           |                      |             |             |             |             |             |             |             |             |             |             |             |             |
| acid                        |                      | 0.019864606 | 0.018336624 | 0.017340744 | 0.020016743 | 0.022931839 | 0.024881757 | 0.050434261 | 0.049984603 | 0.04938632  | 0.048128579 | 0.040065003 | 0.045396672 |
| thymine                     |                      | 0.001308585 | 0.001536876 | 0.001792925 | 0.001300083 | 0.001706634 | 0.001057195 | 0.005353691 | 0.004166249 | 0.004930615 | 0.004783609 | 0.005803243 | 0.007113627 |
| 2-Methylglutaric Acid       |                      | 0.001831177 | 0.002012992 | 0.00178918  | 0.00207314  | 0.002310606 | 0.001925229 | 0.005943169 | 0.005153906 | 0.005031716 | 0.004946772 | 0.005161338 | 0.006102723 |
| malonamide                  |                      | 0.017655895 | 0.012234328 | 0.012825913 | 0.012497339 | 0.009715402 | 0.01040834  | 0.052679766 | 0.056004286 | 0.056889343 | 0.056900387 | 0.041812956 | 0.054350923 |
| 5,6-dihydrouracil           |                      | 0.027501838 | 0.017922347 | 0.022768039 | 0.022963891 | 0.022315751 | 0.020268934 | 0.111049907 | 0.098244591 | 0.107836882 | 0.068634962 | 0.083435387 | 0.126321175 |

---

|                                   |             |             |             |             |             |             |             |             |             |             |             |             |
|-----------------------------------|-------------|-------------|-------------|-------------|-------------|-------------|-------------|-------------|-------------|-------------|-------------|-------------|
| N-Acetyl-L-leucine                | 2.32584E-08 | 2.43822E-08 | 2.46245E-08 | 2.68561E-08 | 0.001131378 | 3.30552E-08 | 0.001634826 | 0.001857144 | 0.001167163 | 0.001911199 | 0.001259605 | 0.001308118 |
| 3-Phenyllactic acid               | 2.32584E-08 | 2.43822E-08 | 2.46245E-08 | 2.68561E-08 | 2.81891E-08 | 3.30552E-08 | 0.009178447 | 0.002247432 | 0.009872479 | 0.00399107  | 0.006074694 | 0.00474583  |
| 2,4-diaminobutyric<br>acid        | 0.022603107 | 0.015262196 | 0.011330833 | 0.016540789 | 0.018036951 | 0.01654055  | 0.066925656 | 0.07017107  | 0.067588549 | 0.072944019 | 0.074913143 | 0.060498922 |
| 4-<br>hydroxyphenylacetic<br>acid | 2.32584E-08 | 2.43822E-08 | 2.46245E-08 | 2.68561E-08 | 2.81891E-08 | 3.30552E-08 | 0.00163529  | 0.00269735  | 0.001217355 | 0.001694655 | 0.002160488 | 0.001116437 |
| N-formyl-L-<br>methionine         | 2.32584E-08 | 2.43822E-08 | 2.46245E-08 | 2.68561E-08 | 2.81891E-08 | 3.30552E-08 | 0.001592506 | 0.001630243 | 0.001072844 | 0.001680693 | 0.001405279 | 0.001103393 |
| 3,6-Anhydro-D-<br>galactose       | 0.096815713 | 0.092099465 | 0.065536342 | 0.084598038 | 0.092098967 | 0.071028205 | 0.007144997 | 0.005744668 | 0.00837207  | 0.006746821 | 0.010048667 | 0.007332523 |
| canavanine                        | 2.32584E-08 | 2.43822E-08 | 2.46245E-08 | 2.68561E-08 | 2.81891E-08 | 3.30552E-08 | 0.020799683 | 0.01303014  | 0.009838741 | 0.015776946 | 0.016584108 | 0.009319571 |
| noradrenaline                     | 0.000555252 | 2.43822E-08 | 2.46245E-08 | 2.68561E-08 | 2.81891E-08 | 3.30552E-08 | 2.72188E-08 | 0.005267914 | 0.002794963 | 0.00336318  | 0.003401643 | 0.002235354 |

---
